# Supplementary material for: Development of a Novel Design and Subsequent Fabrication of an Automated Touchless Hand Sanitizer Dispenser to Reduce the Spread of Contagious Diseases
Source: Healthcare (Basel). 2021 Apr 10;9(4):445. doi: 10.3390/healthcare9040445 (PMC8070052; doi:10.3390/healthcare9040445)
Supplement: Supplementary file 1 [file healthcare-09-00445-s001.pdf]

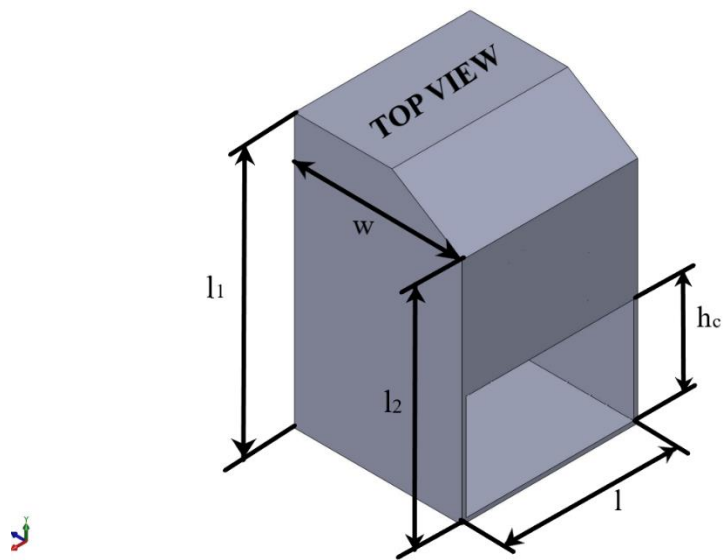

Figure S1. 3D isometric view with parameters

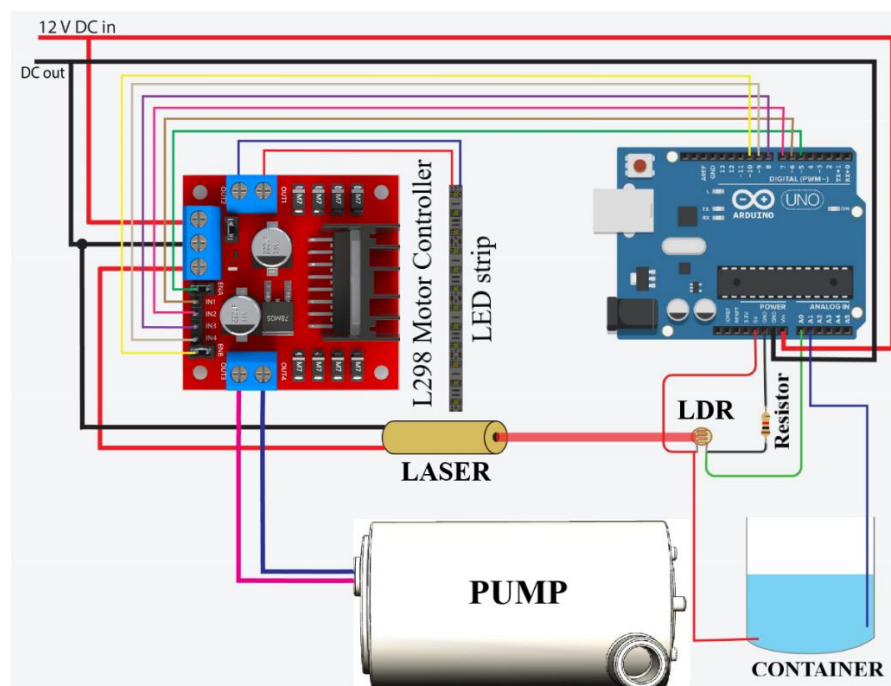

Figure S2 : Schematic of the dispenser circuit

|                                                                                                                                                                                                                                                                                                                                                                                                                                                                                                                                                                                                                                                                                                                                                                                                                                                                                                                                                                                                                                                                                                  |                                                                                                                                                                                                                                                                                                                                                                                                                                                                                                                                                                                                                                                                                                                                                                                                                                                                                  |
|--------------------------------------------------------------------------------------------------------------------------------------------------------------------------------------------------------------------------------------------------------------------------------------------------------------------------------------------------------------------------------------------------------------------------------------------------------------------------------------------------------------------------------------------------------------------------------------------------------------------------------------------------------------------------------------------------------------------------------------------------------------------------------------------------------------------------------------------------------------------------------------------------------------------------------------------------------------------------------------------------------------------------------------------------------------------------------------------------|----------------------------------------------------------------------------------------------------------------------------------------------------------------------------------------------------------------------------------------------------------------------------------------------------------------------------------------------------------------------------------------------------------------------------------------------------------------------------------------------------------------------------------------------------------------------------------------------------------------------------------------------------------------------------------------------------------------------------------------------------------------------------------------------------------------------------------------------------------------------------------|
| <pre> 1 #define limit 550 // LDR sensor threshold 2 void setup() 3 { 4     Serial.begin(115200); 5 // All motor control pins are outputs 6     pinMode(10, OUTPUT); 7     pinMode(9, OUTPUT); 8     pinMode(8, OUTPUT); 9     pinMode(5, OUTPUT); 10    pinMode(6, OUTPUT); 11    pinMode(7, OUTPUT); 12 } 13 void goStraight() 14 { 15     int analogValue = analogRead(A0); 16     if (analogValue &gt; limit) //ldr senses the hand 17     { 18 //turn on LED 19         digitalWrite(7, LOW); 20         digitalWrite(6, HIGH); 21 // set speed to 150 out 255 22         analogWrite(5,255); 23 // turn on motor A 24         digitalWrite(9, HIGH); 25         digitalWrite(8, LOW); 26 // set speed to 150 out 255 27         analogWrite(10,10); 28 //speeding the pump 29         for(int i=10;i&lt;255;i=i+2) 30         { 31             analogWrite(10,i); 32             delay(10); 33         } 34         delay(500); 35 // now turn off motors 36         digitalWrite(9, HIGH); 37         digitalWrite(8, LOW); 38         analogWrite(10,30); 39 // now turn off light </pre> | <pre> 35 // now turn off motors 36     digitalWrite(9, HIGH); 37     digitalWrite(8, LOW); 38     analogWrite(10,30); 39 // now turn off light 40     digitalWrite(6, LOW); 41     digitalWrite(7, LOW); 42 } 43 else 44 { 45     digitalWrite(9, LOW); 46     digitalWrite(8, LOW); 47 } 48 } 49 50 void loop() 51 { 52     int analogValue = analogRead(A0); 53     Serial.println(analogValue); 54     // low-level indication 55     if ( analogRead(A1) &gt; 100) 56     { 57         goStraight(); 58         delay(2000); 59     } 60     else 61 //LED light blinking to indicate 62 //sanitizer level lowinside the 63 //container 64     { 65         digitalWrite(7, LOW); 66         digitalWrite(6, HIGH); 67         delay(1000); 68         digitalWrite(7, LOW); 69         digitalWrite(6, LOW); 70         delay(1000); 71     } 72 } //End of the code </pre> |
|--------------------------------------------------------------------------------------------------------------------------------------------------------------------------------------------------------------------------------------------------------------------------------------------------------------------------------------------------------------------------------------------------------------------------------------------------------------------------------------------------------------------------------------------------------------------------------------------------------------------------------------------------------------------------------------------------------------------------------------------------------------------------------------------------------------------------------------------------------------------------------------------------------------------------------------------------------------------------------------------------------------------------------------------------------------------------------------------------|----------------------------------------------------------------------------------------------------------------------------------------------------------------------------------------------------------------------------------------------------------------------------------------------------------------------------------------------------------------------------------------------------------------------------------------------------------------------------------------------------------------------------------------------------------------------------------------------------------------------------------------------------------------------------------------------------------------------------------------------------------------------------------------------------------------------------------------------------------------------------------|

Figure S3 : The coding of the dispenser according to the algorithm
